# Supplementary material
Source: publisher figshare collection journal article supplement (https://acs.figshare.com/ndownloader/files/14460365)
Supplement: Supplementary file 1 [file 14460365]

## *Supporting Information*

# **Facile Preparation of Cu/Ag Core/Shell Electrospun Nanofibers as Highly Stable and Flexible Transparent Conductive Electrodes for Optoelectronic Devices**

Dai-Hua Jiang,<sup>a,b,c, +</sup> Ping-Chun Tsai,<sup>a, +</sup> Chi-Ching Kuo,<sup>a,d, \*</sup> Fu-Cheng Jhuang,<sup>a</sup> Hao-Cheng Guo,<sup>a</sup> Shih-Pin Chen,<sup>e</sup> Ying-Chih Liao,<sup>e</sup> Toshifumi Satoh,<sup>c, \*,</sup> and Shih-Huang Tung<sup>b, \*</sup>

<sup>a</sup> Institute of Organic and Polymeric Materials, National Taipei University of Technology, Taipei, Taiwan.

<sup>b</sup> Institute of Polymer Science and Engineering, National Taiwan University, 106 Taipei, Taiwan

<sup>c</sup> Faculty of Engineering and Graduate School of Chemical Sciences and Engineering, Hokkaido University, Sapporo 060-8628, Japan

<sup>d</sup> Research and Development Center for Smart Textile Technology, National Taipei University of Technology, 10608 Taipei, Taiwan.

<sup>e</sup> Department of Chemical Engineering, National Taiwan University, Taipei, Taiwan

+ D.-H. Jiang and P.-C. Tsai contributed equally to this work

\*Author to whom all correspondence should be addressed

● Tel.: 886-2-27712171 (ext. 2407); Fax: 886-2-27317174

Correspondence to: \*Prof. C.-C. Kuo      kuocc@mail.ntut.edu.tw

\*Prof. T. Satoh      satoh@eng.hokudai.ac.jp

\*Prof. S.-H. Tung      shtung@ntu.edu.tw

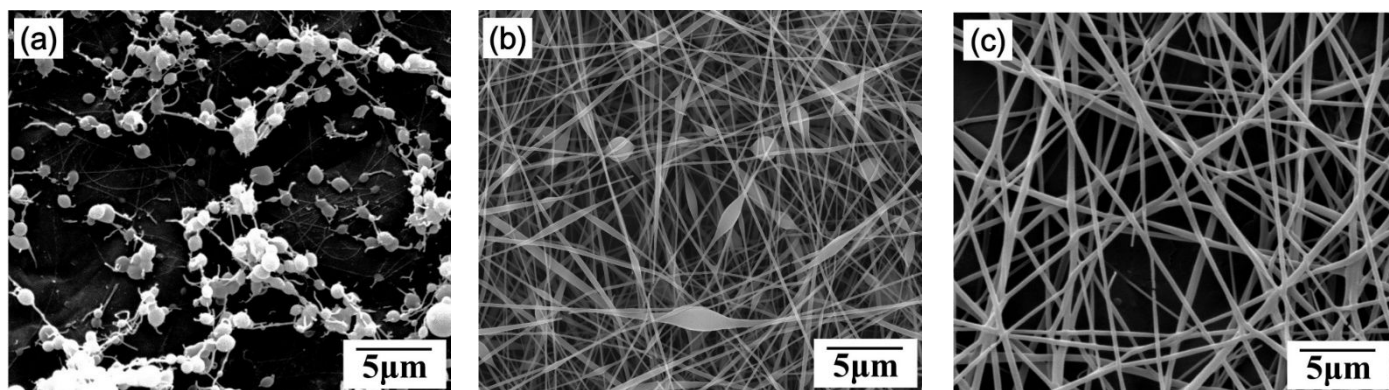

Figure S1. FE-SEM images of CuAc<sub>2</sub>/PVP electrospun nanofibers with various concentrations: (a) 10 wt%, (b) 15 wt%, and (c) 20 wt%.

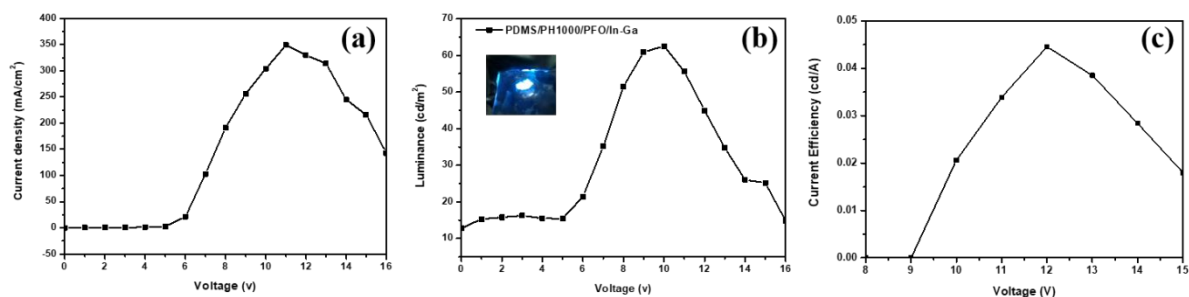

Figure S2. (a) Current density-voltage, (b) Luminance-voltage, (c) Current efficiency-voltage.
